# Supplementary material for: High frequency of HPV genotypes 59, 66, 52, 51, 39 and 56 in women from Western Mexico
Source: PubMed Central journal article supplement (PMC7690193; doi:10.1186/s12879-020-05627-x), 2020-11-25

### Aguascalientes

n=71

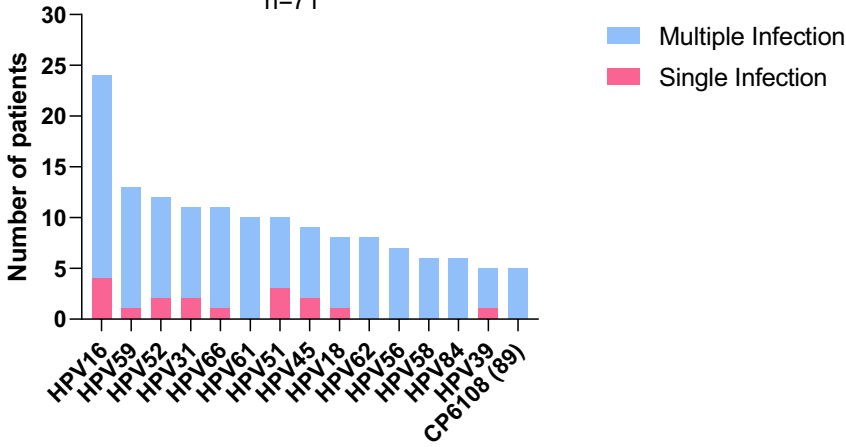

### Colima

n=29

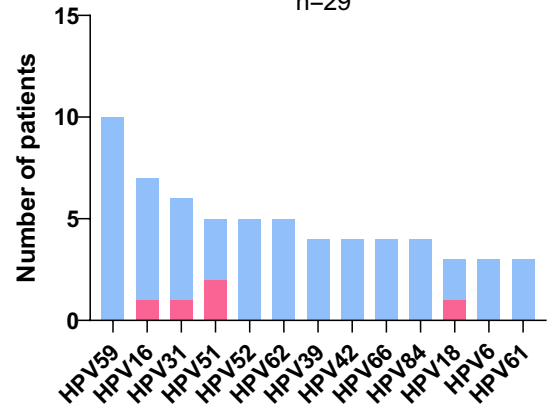

### Nayarit

n=35

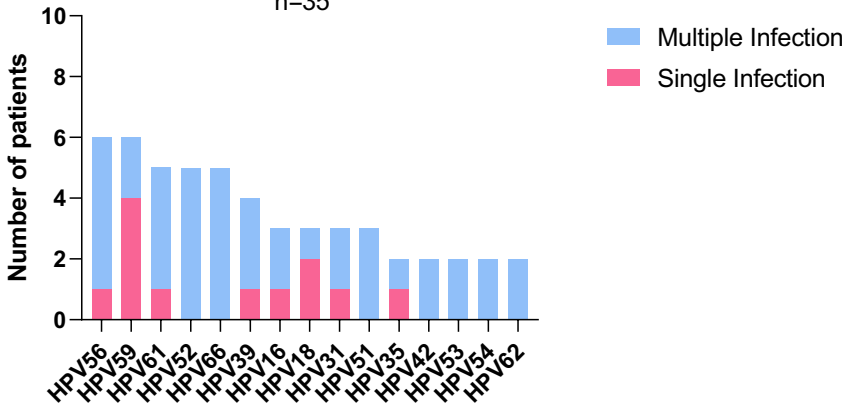

### Jalisco

n=37

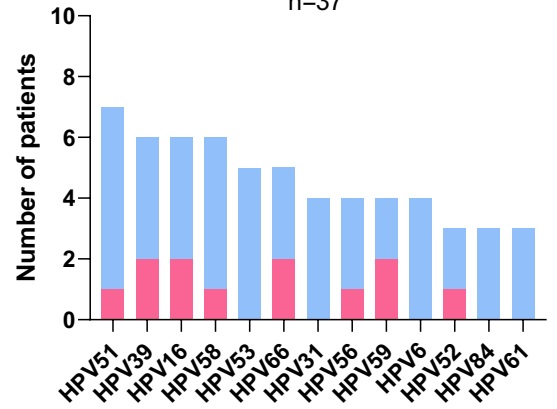

### Michoacan

n=58

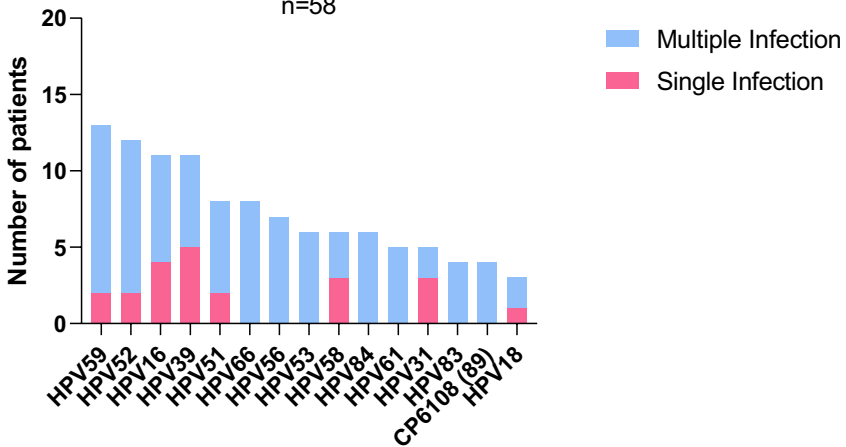

### Guanajuato

n=70

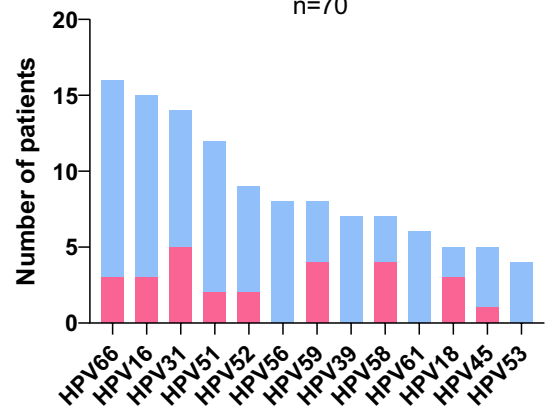

Supplement: 12879_2020_5627_MOESM1_ESM.pdf [file 12879_2020_5627_MOESM1_ESM.pdf]
